# Supplementary material
Source: PubMed Central journal article supplement (PMC4675089)
Supplement: NIHMS64509-supplement-01.pdf [file NIHMS64509-supplement-01.pdf]

1 SUPPLEMENTARY INFORMATION

2

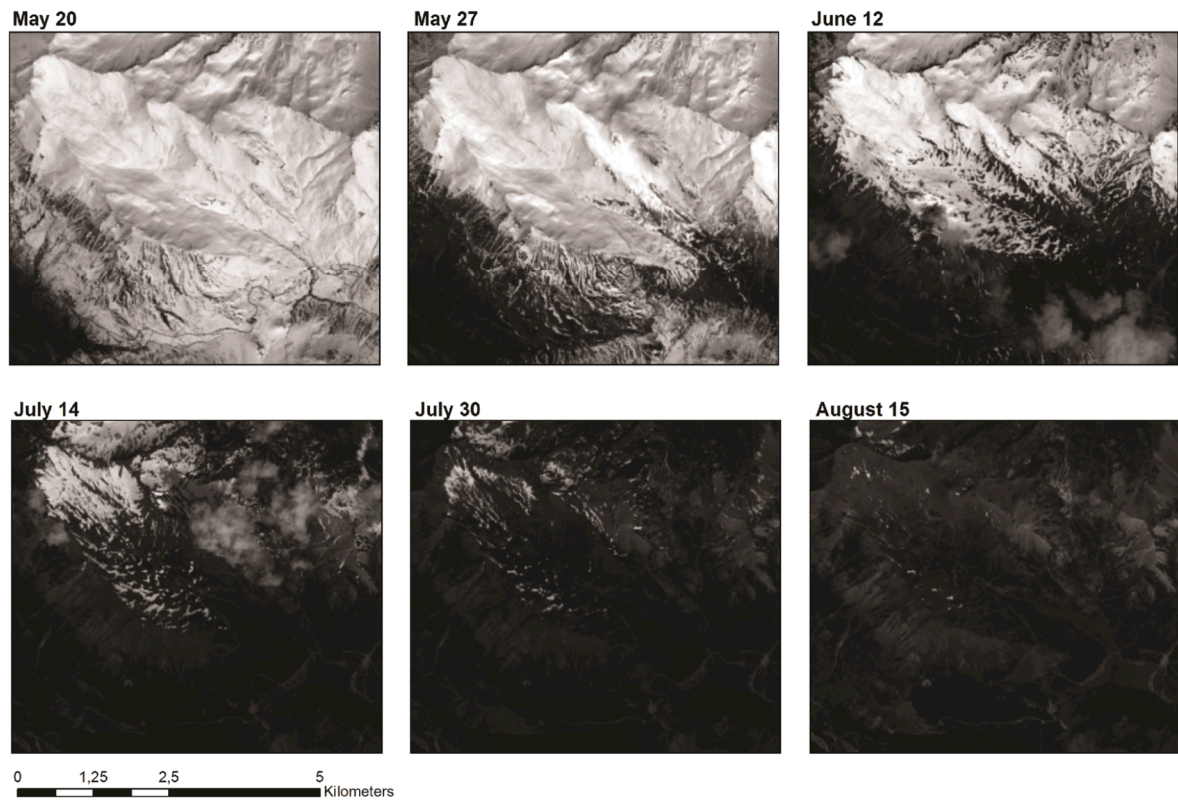

3

4

5

6

7

**Figure S1.** Landsat 8 scenes from 2013 cropped to the study area. Images are from the panchromatic band 8 (15m resolution).

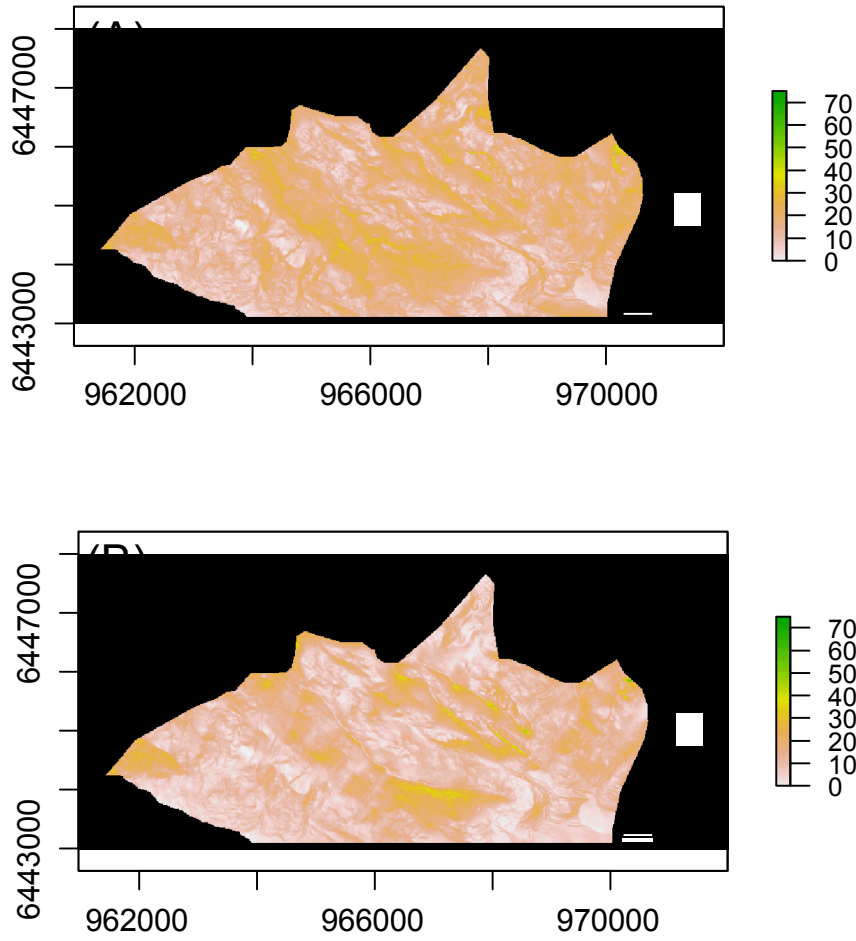

1  
2 **Figure S2.** Combined slope and topographic position index maps derived for a 45m moving  
3 window (A) and for a 225m moving window (B).  
4  
5

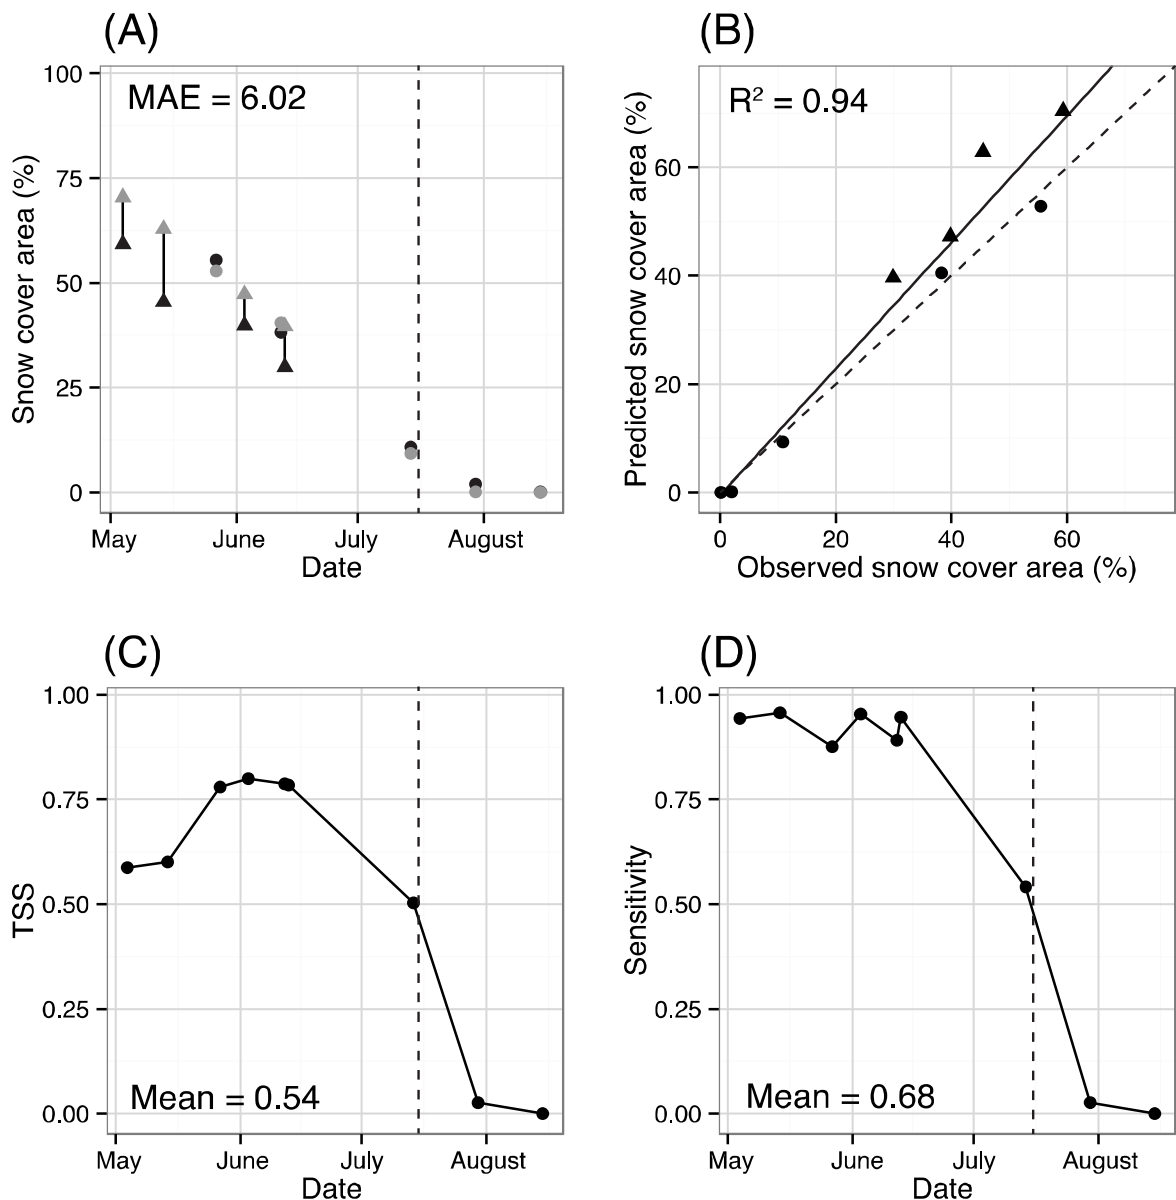

1  
2 **Figure S3.** (A) Observed (black) and predicted (grey) snow cover area for 2013 Landsat and  
3 SPOT acquisition dates. MAE = mean absolute error; triangles correspond to SPOT 4 imagery,  
4 while circles correspond to Landsat 8. (B) Observed and predicted snow cover area estimates for  
5 the nine image acquisition dates. The dashed line indicates a perfect relationship, while the solid  
6 line shows the OLS best fit. (C) Agreement, estimated by the True Skill Statistic (TSS), between  
7 observed and predicted snow cover area maps. (D) Proportion of observed snow-covered pixels  
8 detected by the GAM model, as measured by Sensitivity. The dashed line in panels A, C and D  
9 corresponds to July 15.

10  
11  
12  
13

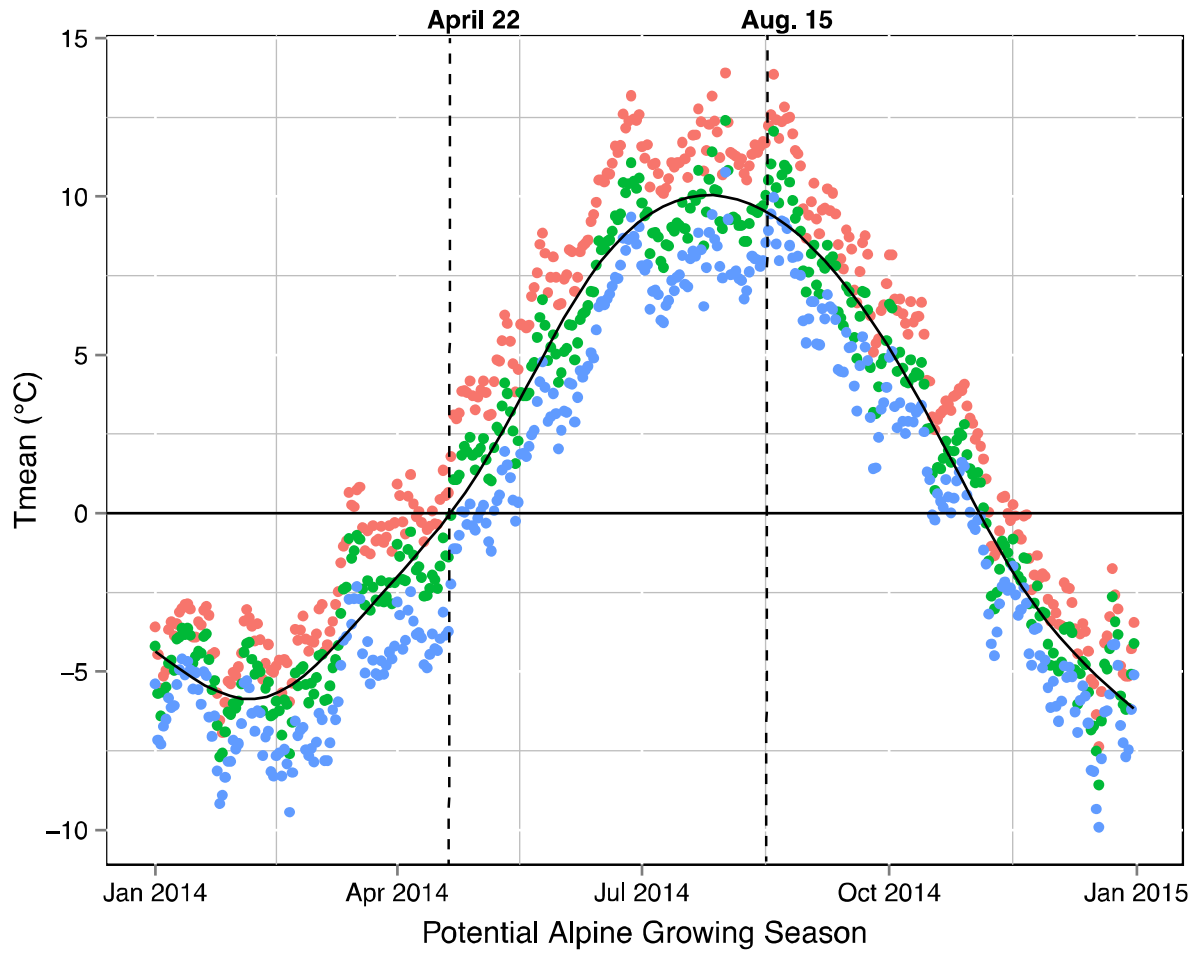

1  
 2 **Figure S4.** Daily mean air temperatures for the 2000-2013 period. Snowmelt timing and growing  
 3 season energy gradients were estimated for calendar days falling between the two dashed vertical  
 4 lines. Red points = 2100 – 2400 m a.s.l. ; green points = 2400 – 2700 m a.s.l.; blue points = 2700  
 5 – 3000 m a.s.l. The trend line represents a smooth loess function.

6  
 7  
 8  
 9  
 10  
 11  
 12  
 13  
 14  
 15  
 16  
 17  
 18  
 19  
 20  
 21

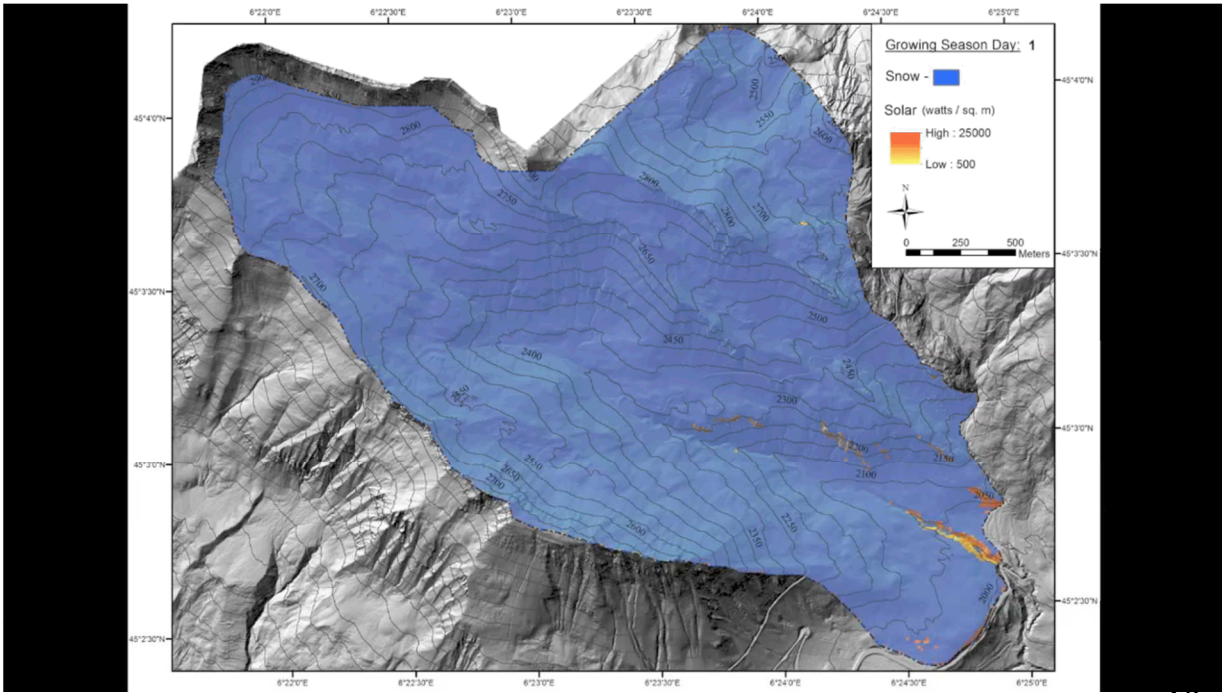

18

19 **Video.** Animation of daily snow melt combined with daily maps of solar radiation (growing  
 20 season day 1 = April 22, 2013; growing season day 110 = August 10, 2013.  
 21  
 22  
 23  
 24  
 25  
 26  
 27  
 28  
 29  
 30  
 31  
 32  
 33  
 34  
 35  
 36  
 37  
 38  
 39  
 40  
 41  
 42  
 43  
 44  
 45  
 46  
 47
